# Supplementary material for: Novel Polyomaviruses in Mammals from Multiple Orders and Reassessment of Polyomavirus Evolution and Taxonomy
Source: MDPI journal article supplement (doi:10.3390/v11100930), 2019-10-10
Supplement: s2 [file s2]

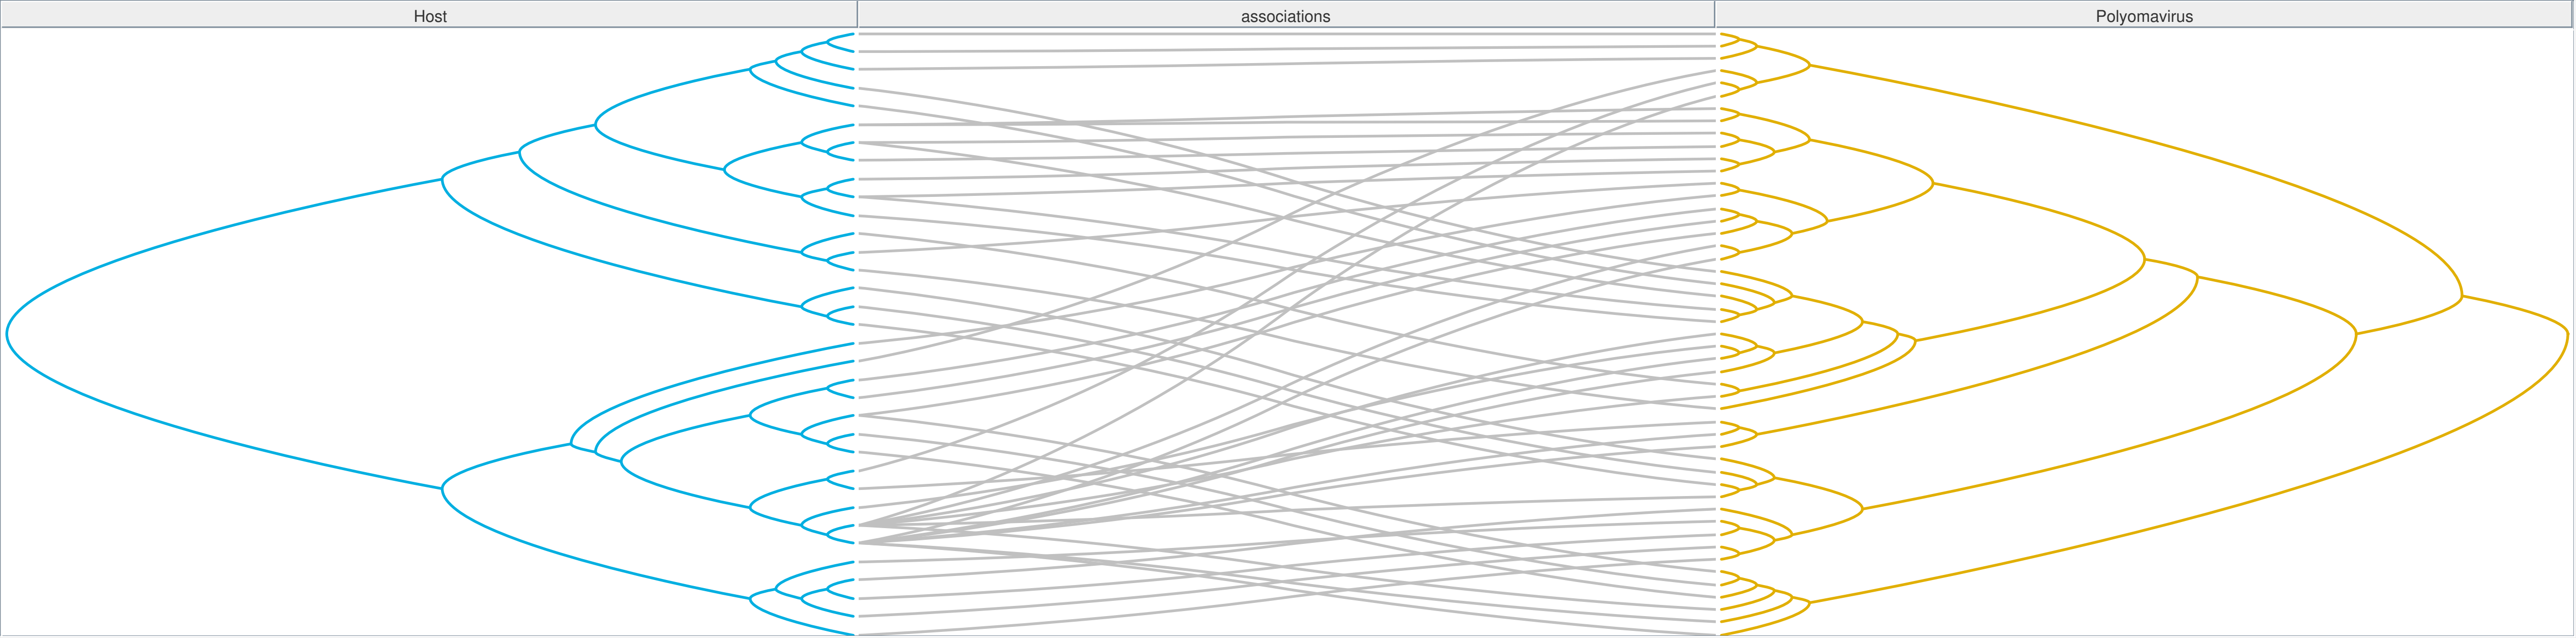

**Figure S14**      **Tanglegram of host and alphapolyomavirus phylogenetic trees.** Host-alphapolyomavirus associations are represented by the lines connecting leaves of both trees.
