# Supplementary material for: Novel Polyomaviruses in Mammals from Multiple Orders and Reassessment of Polyomavirus Evolution and Taxonomy
Source: MDPI journal article supplement (doi:10.3390/v11100930), 2019-10-10
Supplement: s2 [file s2]

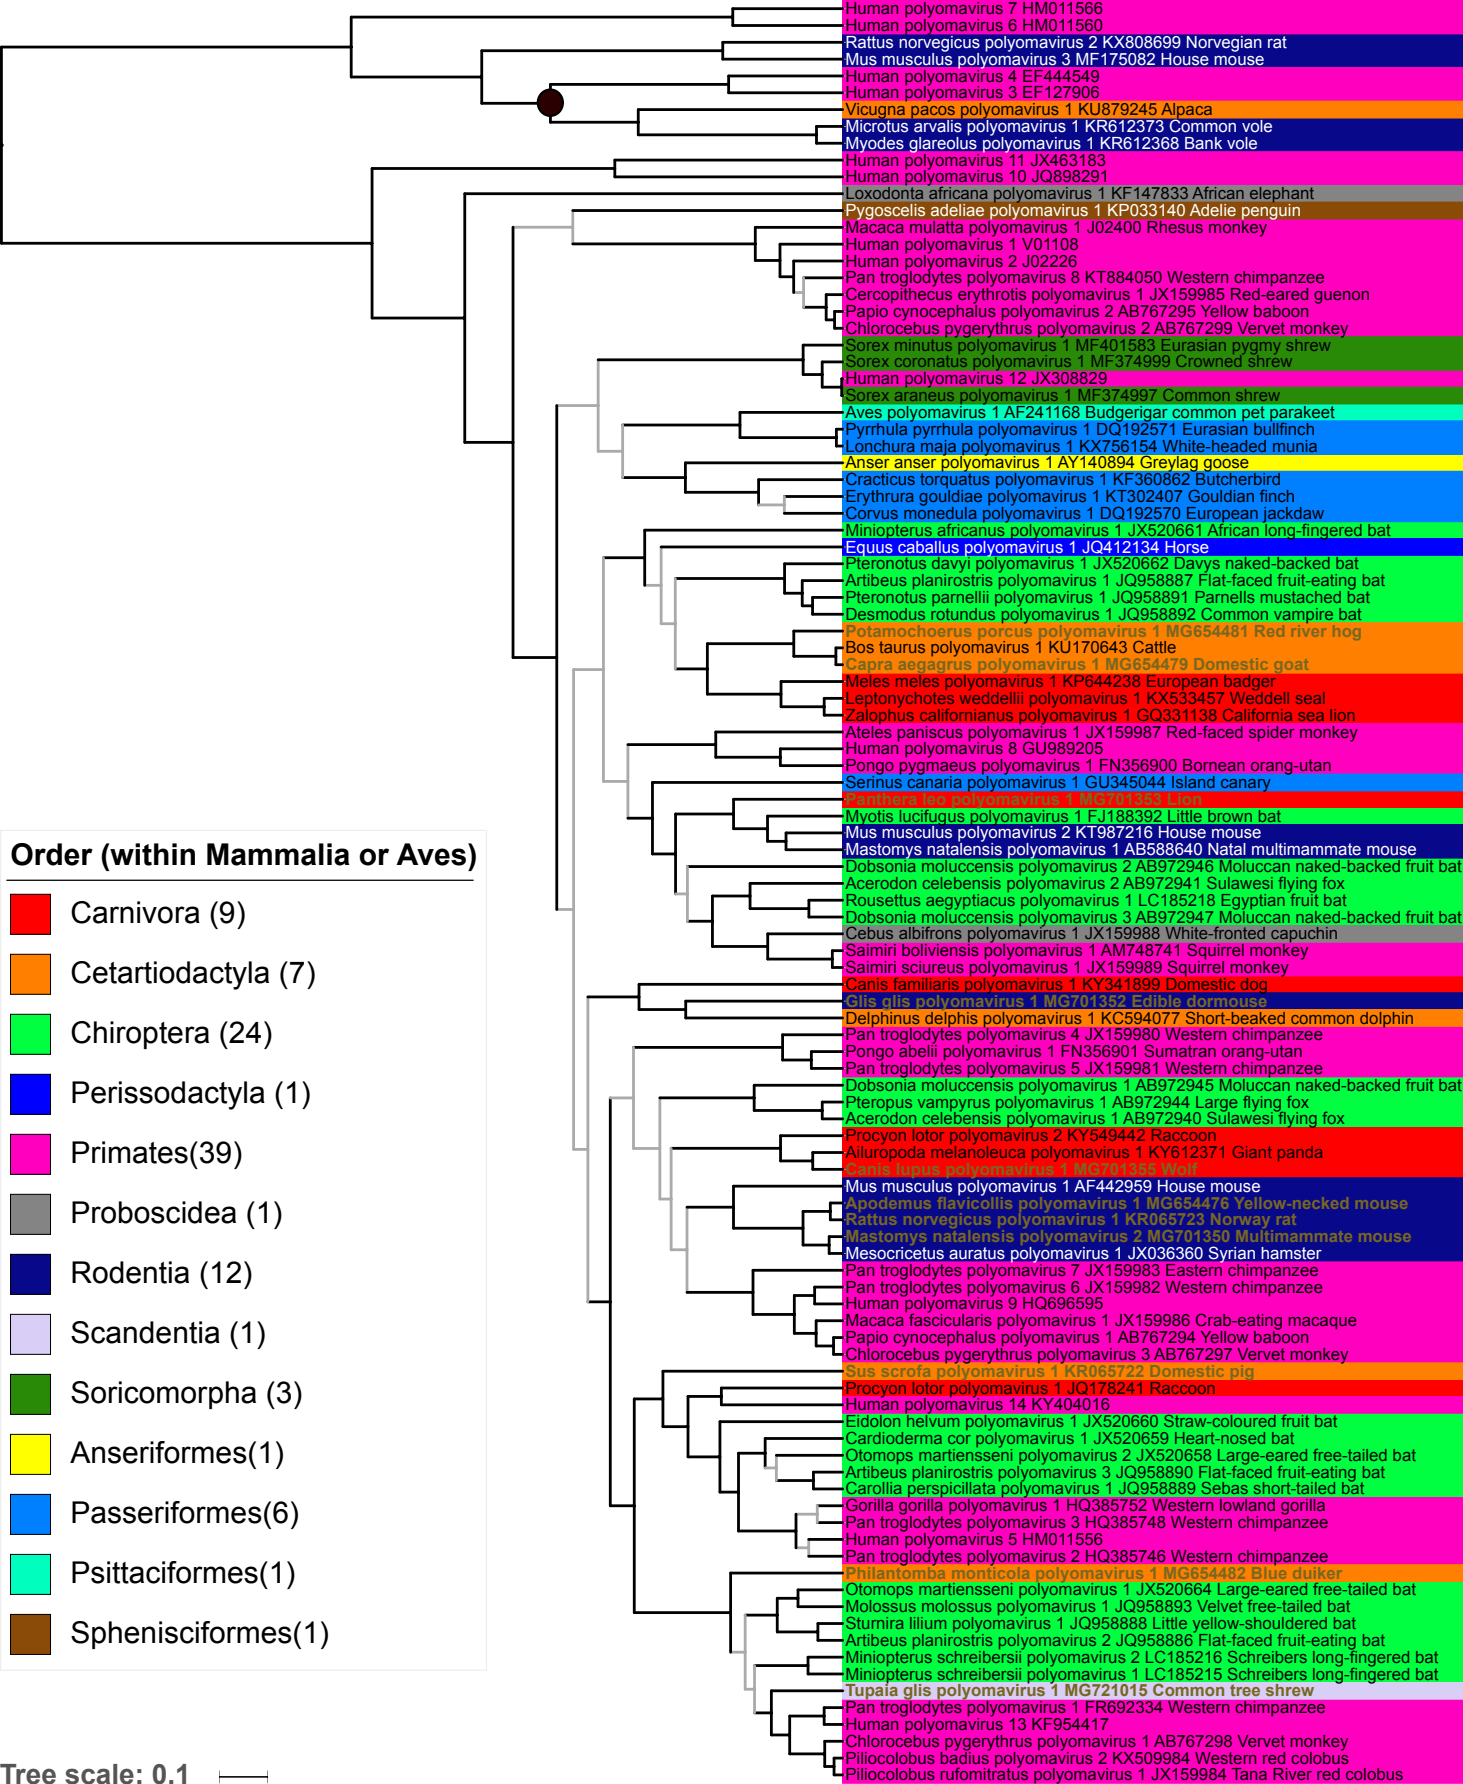

**Figure S12** Phylogenetic relationships of polyomaviruses based on conserved amino acid blocks of the VP1 sequences with highlighted host orders. See legend of Figure S7.
