# Supplementary material for: Novel Polyomaviruses in Mammals from Multiple Orders and Reassessment of Polyomavirus Evolution and Taxonomy
Source: MDPI journal article supplement (doi:10.3390/v11100930), 2019-10-10
Supplement: s2 [file s2]

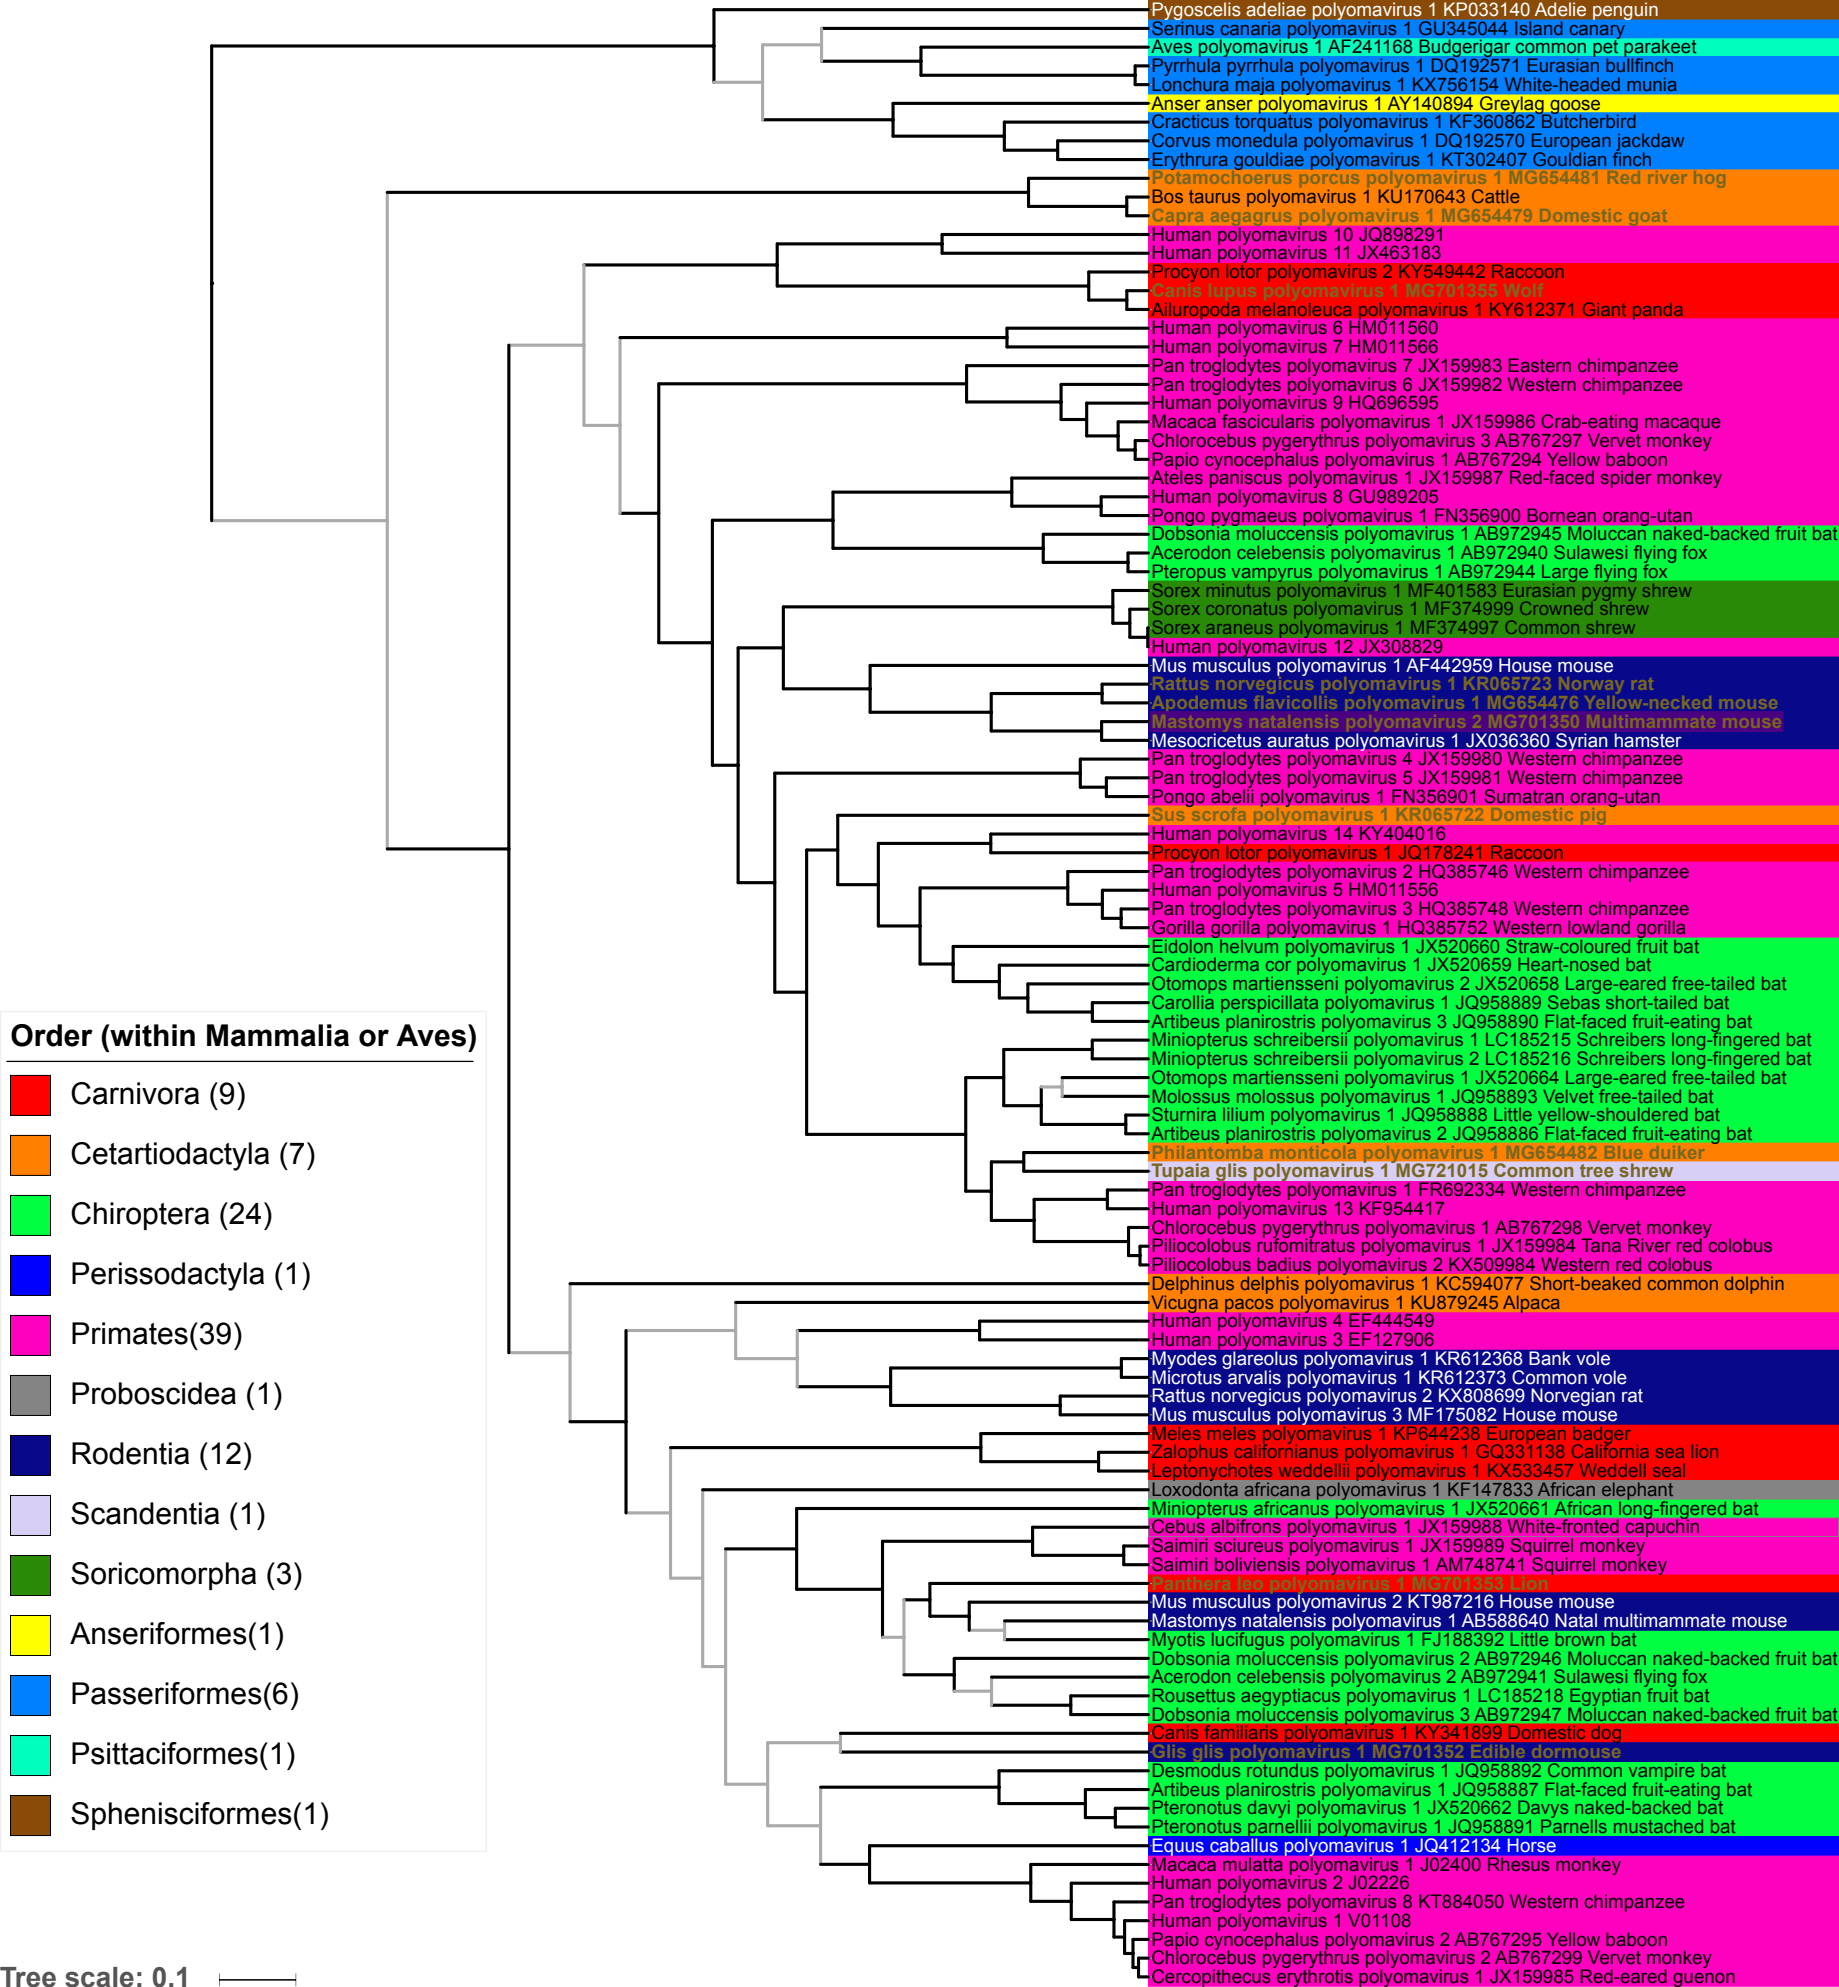

**Figure S11****Phylogenetic relationships of polyomaviruses based on conserved amino acid****blocks of the LTA<sub>g</sub> sequences with highlighted host orders.** Polyomavirus naming

follow the recommendations of the ICTV Polyomaviridae study group using Latin

binomials of their hosts and a serial number; accession numbers and vernacular

names of the host are also given. This maximum clade credibility tree was generated

using Bayesian Markov chain Monte Carlo analyses; a maximum likelihood analysis

recovered a very similar topology (not shown). Grey branches are relatively weakly

supported with posterior probability values < 0.95. Names of viruses are given in

black or white font. The names of the novel polyomaviruses are given in bold and

light brown font.
